# Supplementary material
Source: PubMed Central journal article supplement (PMC6099390)

Supplemental Figure S1:

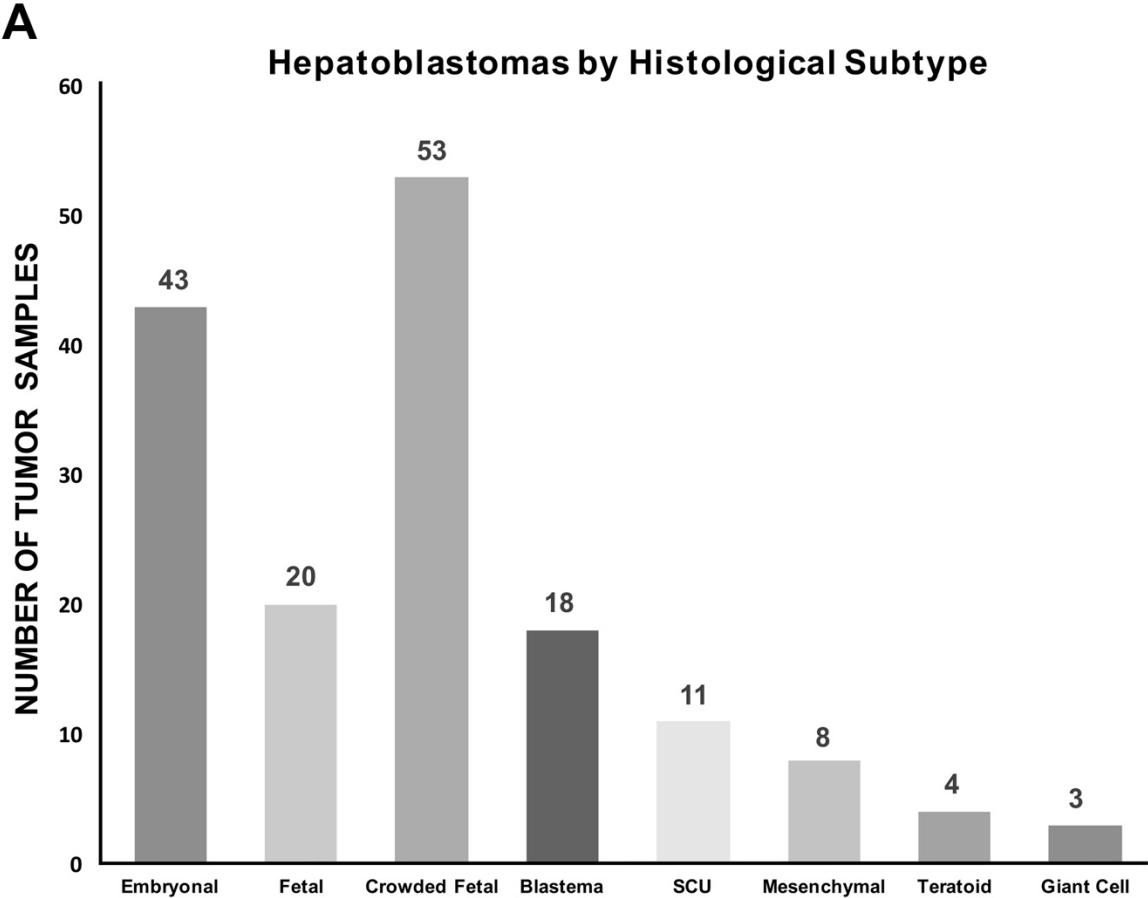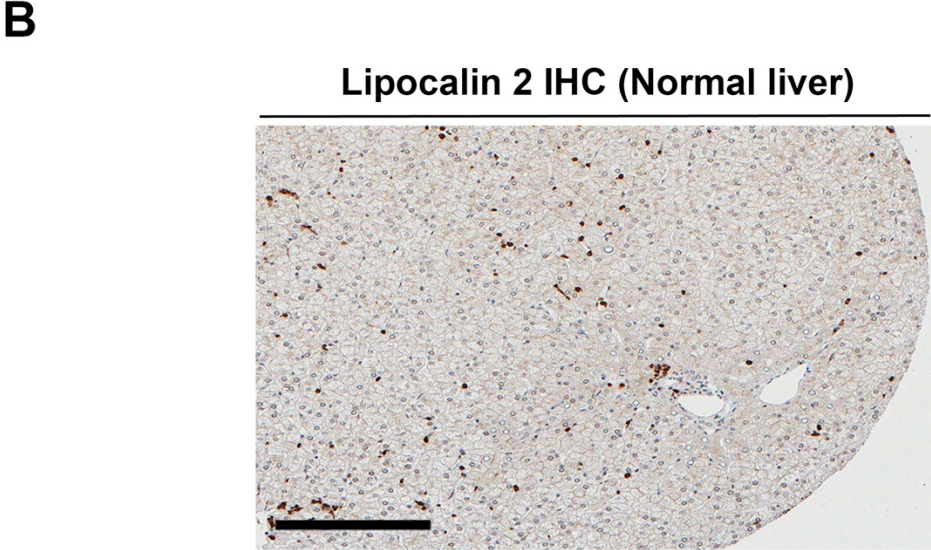

Supplement: mmc1.pdf [file mmc1.pdf]
